# Supplementary material for: A small molecule targeting protein translation does not rescue spatial learning and memory deficits in the hAPP-J20 mouse model of Alzheimer’s disease
Source: PubMed Central journal article supplement (PMC5075699; doi:10.7717/peerj.2565), 2016-10-19

**A****24 hr % Target Quadrant**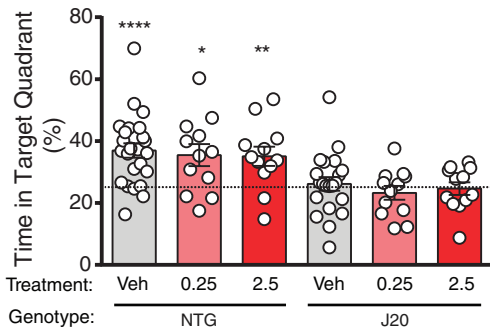**B****24 hr Latency to Target**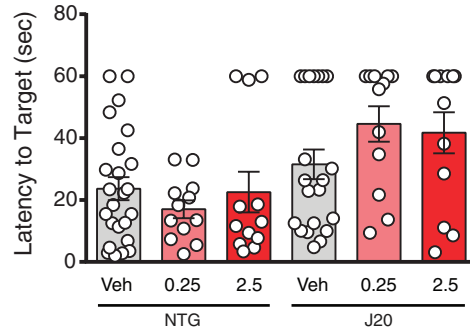**C****24 hr Crossing Frequency**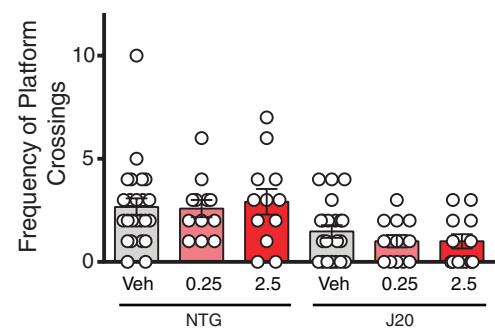**D****72 hr % Target Quadrant**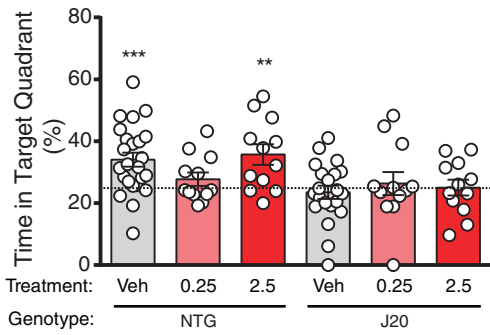**E****72 hr Latency to Target**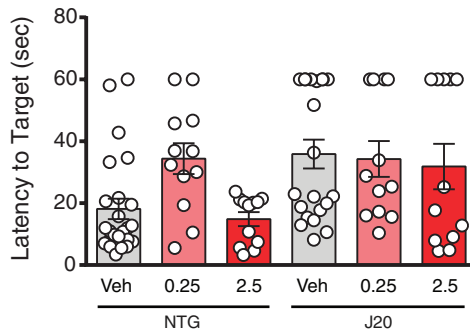**F****72 hr Crossing Frequency**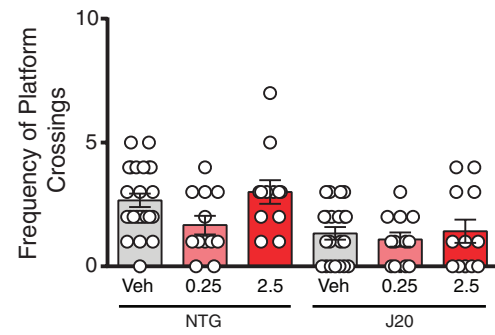

Supplement: peerj-04-2565-s003.pdf [file peerj-04-2565-s003.pdf]
